# Supplementary material
Source: MDPI journal article supplement (https://www.mdpi.com/2079-6412/13/6/1047)
Supplement: s1 [file s1 › coatings-2413522-supplementary.pdf]

# Flame-Retardant and Fire-Sensing Packaging Papers Enabled by Diffusion-Driven Self-Assembly of Graphene Oxide and Branched Polyethyleneimine Coatings

Piao Wen <sup>1</sup>, Jing Ren <sup>1</sup>, Qiang Zhang <sup>2,\*</sup> and Shengjie Ling <sup>1,3,\*</sup>

<sup>1</sup> School of Physical Science and Technology, ShanghaiTech University, Shanghai 201210, China; wenpiao@shanghaitech.edu.cn (P.W.); renjing@shanghaitech.edu.cn (J.R.)

<sup>2</sup> School of Textile Science and Engineering, Wuhan Textile University, Wuhan 430200, China

<sup>3</sup> Shanghai Clinical Research and Trial Center, Shanghai 201210, China

\* Correspondence: qiang.zhang@wtu.edu.cn (Q.Z.); lingshj@shanghaitech.edu.cn (S.L.)

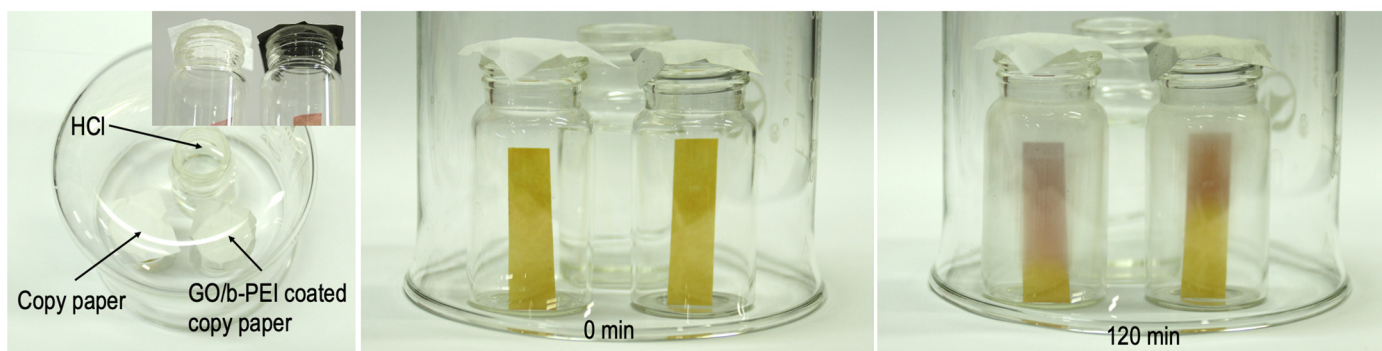

**Figure S1.** Vapored HCl from a vessel with concentrated HCl solution diffused into two vessels covered by pristine copy paper (left) and GPC-copy paper (right) and caused the color change of pH test papers. Pristine copy paper and GPC-copy paper were fixed to the vessel mouth with tape and ensured to be sealed.

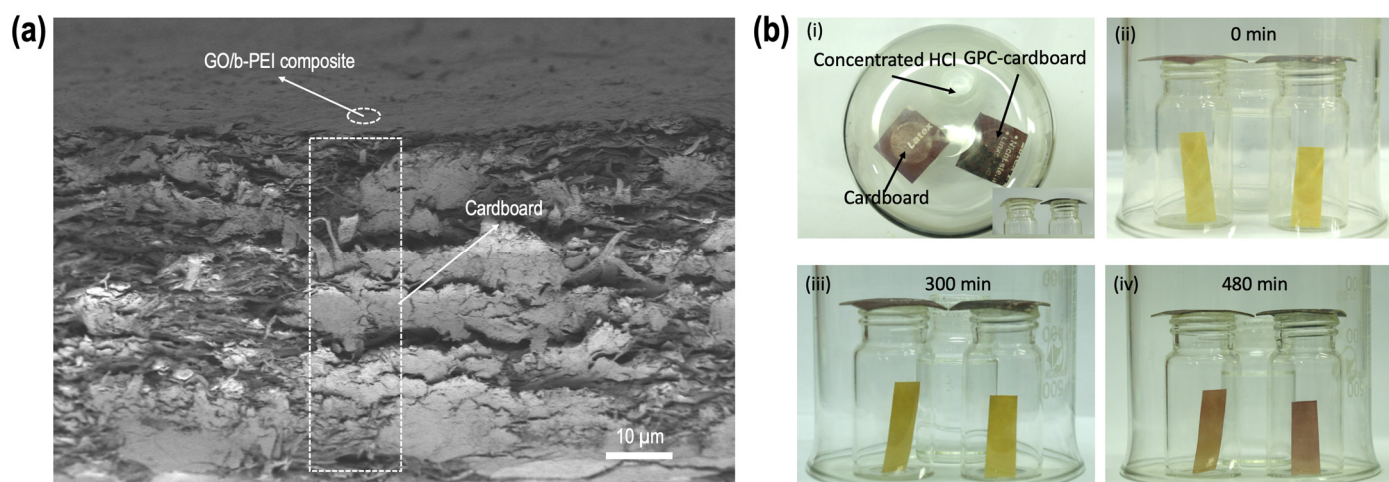

**Figure S2.** Effect of the GO/b-PEI on cardboard for water-resistance. (a) Cross-sectional SEM image of GPC-cardboard. (b) Vapored HCl from a vessel with concentrated HCl solution diffused into two vessels covered by pristine cardboard (left) and GPC-cardboard (right) and caused the color change of pH test papers. Pristine cardboard and GPC-cardboard were fixed to the vessel mouth with tape and ensured to be sealed.

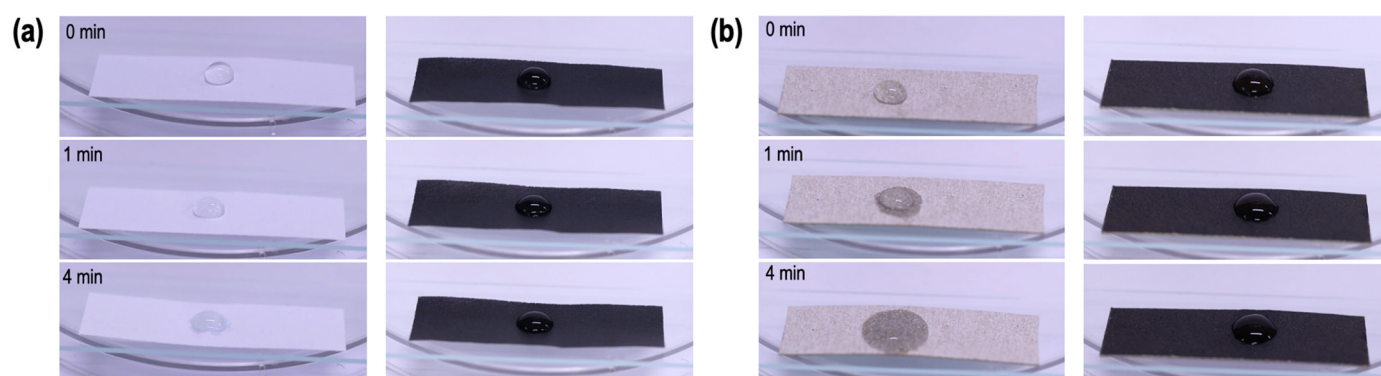

**Figure S3.** Photographs of water droplets staying on the surfaces of (a) copy paper and GPC-copy paper, as well as (b) cardboard and GPC-cardboard.

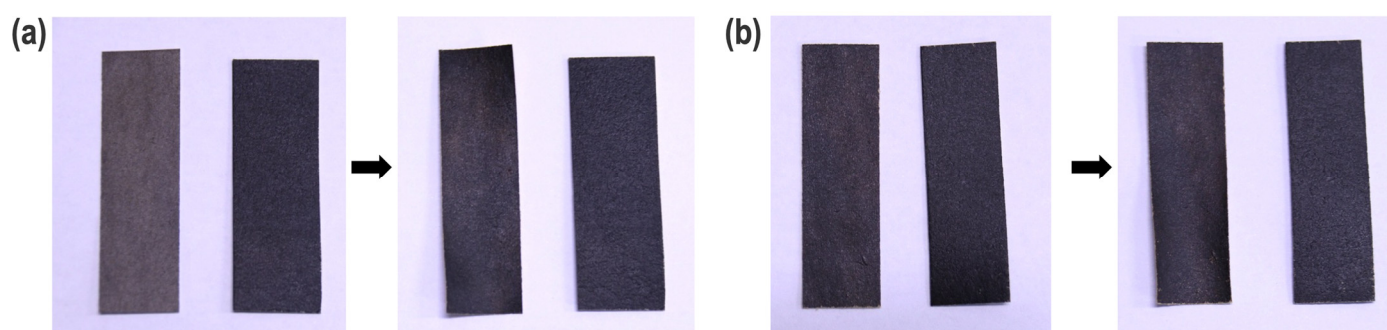

**Figure S4.** GPC-kraft paper (left) and GPC-cardboard (right) were treated with (a) water immersion of 4 hours and (b) water immersion of 15 minutes and ultrasonication of 1 min, respectively.

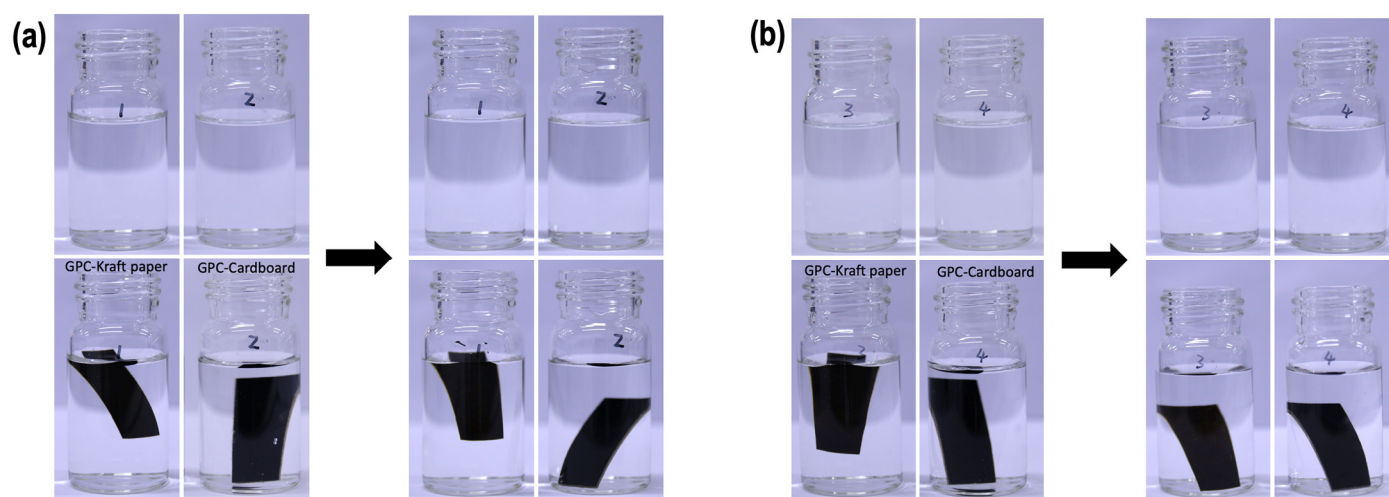

**Figure S5.** (a) Photographs showing the water solution from GPC-kraft paper and GPC-cardboard after 4 hours of water immersion. (b) Photographs showing the water solution from GPC-kraft paper and GPC-cardboard after 15 minutes of water immersion followed by 1 minute of ultrasonication.

**Table S1.** Mass of GPC-kraft paper and GPC-carboard samples before and after treatment of 4 hours water immersion and 15 minutes water immersion combined with ultrasonication of 1 min.

| Name              | Kraft paper (g) | GPC-kraft paper (g) | GPC-kraft paper (g) | GPC-kraft paper (g) | Cardboard (g) | GPC-card-board (g) | GPC-card-board (g) | GPC-card-board (g) |
|-------------------|-----------------|---------------------|---------------------|---------------------|---------------|--------------------|--------------------|--------------------|
| Number            | Reference       | Set1                | Set2                | Set3                | Reference     | Set1               | Set2               | Set3               |
| Immersion-before  | 0.0393          | 0.0387              | 0.0371              | 0.0374              | 0.1423        | 0.1485             | 0.1339             | 0.1039             |
| Immersion-after   | 0.0387          | 0.0386              | 0.037               | 0.0371              | 0.1411        | 0.1467             | 0.1312             | 0.1028             |
| Sonication-before | 0.0403          | 0.0405              | 0.0385              | 0.0386              | 0.1433        | 0.1521             | 0.1388             | 0.1174             |
| Sonication-after  | 0.0399          | 0.0404              | 0.0385              | 0.0385              | 0.1429        | 0.1501             | 0.1384             | 0.1171             |

**Table S2.** Mass loss rate of GPC-kraft paper and GPC-carboard samples treated with water immersion of 4 hours and water immersion of 15 minutes and ultrasonication of 1 min, respectively. **Table S2.** Mass loss rate of GPC-kraft paper and GPC-carboard samples treated with water immersion of 4 hours and water immersion of 15 minutes and ultrasonication of 1 min, respectively.

| Name                     | Kraft paper (%) | GPC-kraft paper (%) | GPC-kraft paper (%) | GPC-kraft paper (%) | Cardboard (%) | GPC-card-board (%) | GPC-card-board (%) | GPC-card-board (%) |
|--------------------------|-----------------|---------------------|---------------------|---------------------|---------------|--------------------|--------------------|--------------------|
| Number                   | Reference       | Set1                | Set2                | Set3                | Reference     | Set1               | Set2               | Set3               |
| Immersion                | −1.53%          | −0.26%              | −0.27%              | −0.80%              | −0.84%        | −1.21%             | −2.02%             | −1.06%             |
| Immersion and sonication | −0.99%          | −0.25%              | 0                   | −0.26%              | −0.28%        | −1.31%             | −0.29%             | −0.26%             |
